# Psychiatric Services

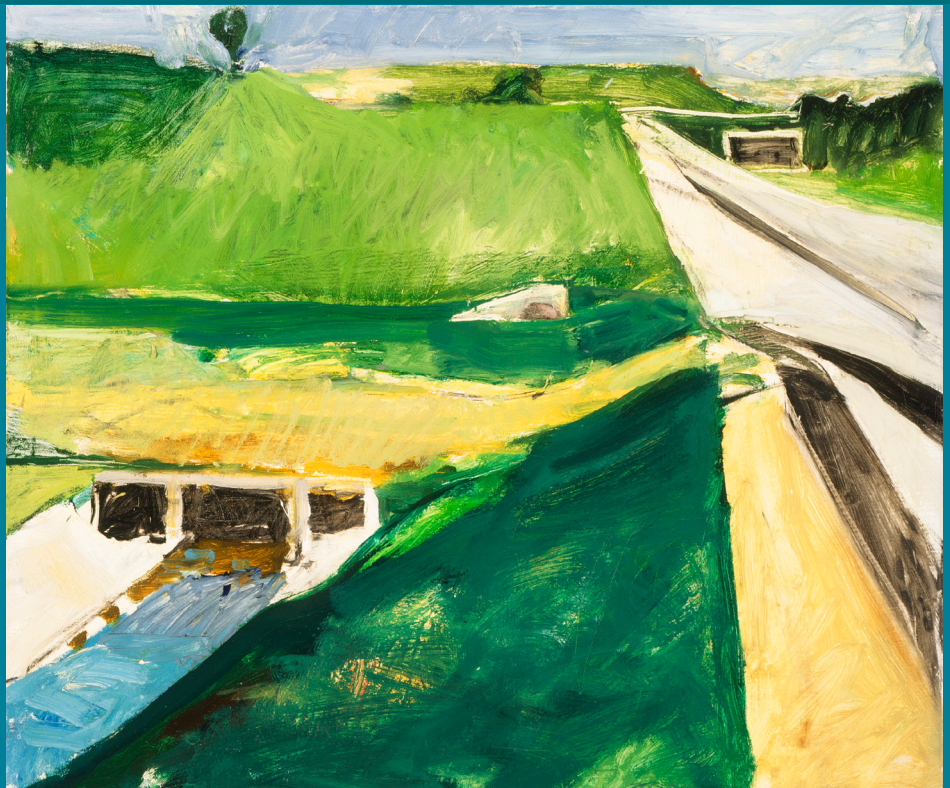

Recovery on the job: strategies to cope with psychosis symptoms  
Virtual Hope Box smartphone app for veterans coping with distress  
Improving support for bereaved families of suicidal patients  
Antistigma training in the Texas classroom
