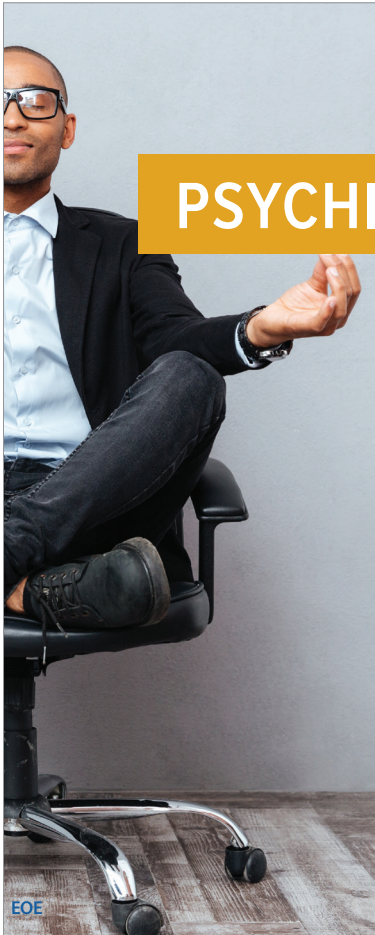

## FIND YOUR CAREER BALANCE IN CALIFORNIA

### PSYCHIATRISTS

**\$244,128 - \$293,340**  
annual salary (Board Certified)

**\$237,864 - \$285,072**  
annual salary (Board Eligible)

California Department of Corrections and Rehabilitation (CDCR) is seeking proactive, knowledgeable psychiatrists with an interest in correctional and/or forensic psychiatry to join our multidisciplinary teams. With CDCR, you will find like-minded professionals well-versed in the intricate psychiatric and medical interplay necessary to treat our diverse patient population. Here, you will see and develop treatment plans for cases you won't encounter in any other practice. And with our strong Positive Behavioral Support Team's assistance, you'll be able to devote your time to practicing and honing advanced psychopharmacological skills. Plus, with 35 locations throughout California, you're sure to find your perfect fit.

In return for your efforts, we offer:

- 40-hour workweek with flexible schedules
- Generous paid time off and holiday schedule
- State of California pension that vests in five years
- 401(k) and 457(b) options – tax defer up to \$35,000 per year
- Paid insurance, license, and DEA renewal
- Visa sponsorship opportunities
- Paid CME with paid time off to attend
- \$10,000 Thank You Bonus to professionals newly hired with the State of California

Take the first step in joining one of our teams and contact **LaTreese Phillips** at **916-691-4818** or **LaTreese.Phillips@cdcr.ca.gov**. You may also apply online at **www.ChangingPrisonHealthCare.org**.

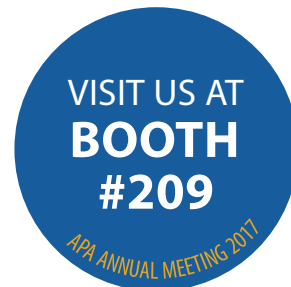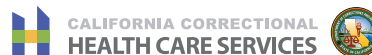

EOE

**Psychiatric Services** (ISSN |1075-2730; online version, 1557-9700) is published monthly by the American Psychiatric Association, editorial and executive office, 1000 Wilson Blvd., Suite 1825, Arlington, VA 22209-3901. Copyright © 2016 by the American Psychiatric Association. Printed in U.S.A. Periodicals postage paid at Arlington, VA, and at additional mailing offices. POSTMASTER: Send address changes to **Psychiatric Services, 1000 Wilson Blvd., Suite 1825, Arlington, VA 22209-3901.**

"DMH is an excellent starting point for anyone coming out of a residency or fellowship program. It is very low anxiety, you know what the practice is going to be like, and it's a great group of people to work with."  
**Michael Fitzpatrick, M.D.**  
Child & Adolescence Psychiatrist,  
Juvenile Justice

## UNMATCHED GROWTH OPPORTUNITIES

Los Angeles County has immediate openings with Antelope Valley, Correctional Health Services, Juvenile Halls and Probation Camps, and directly operated programs. This is your chance to join the leading mental health agency in the nation and work in a safe, diverse, and challenging environment. The County is filled with opportunities for professional development and growth, and is expanding exponentially with new full-time psychiatrist positions. We offer competitive starting salaries and benefits with potential bonuses up to \$30,000\* a year. The County allows up to 24 hours a week for outside employment. Some positions qualify for loan forgiveness.



[www.psychiatristjobs.la](http://www.psychiatristjobs.la)

\*Depending on qualifications and placement.

"DMH provides you with long term job security. They offer great benefits with the opportunity for you to work in different settings. There are several variety/flexible work schedules and most do not include after hours or weekends."  
**Romana Zvereva, M.D.**  
Mental Health Psychiatrist

# The DSM-5 Collection

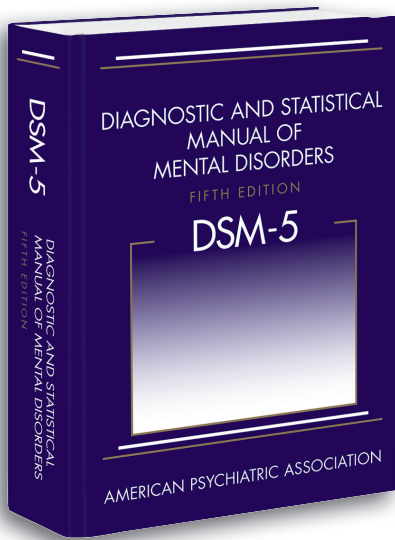

## Diagnostic and Statistical Manual of Mental Disorders, Fifth Edition (DSM-5®)

American Psychiatric Association

This new edition of *Diagnostic and Statistical Manual of Mental Disorders* (DSM-5®), used by clinicians and researchers to diagnose and classify mental disorders, is the product of more than 10 years of effort by hundreds of international experts in all aspects of mental health. Their dedication and hard work have yielded an authoritative volume that defines and classifies mental disorders in order to improve diagnosis, treatment, and research.

The criteria are concise and explicit, intended to facilitate an objective assessment of symptom presentations in a variety of clinical settings—inpatient, outpatient, partial hospital, consultation-liaison, clinical, private practice, and primary care.

- The latest findings in neuroimaging and genetics have been integrated into each disorder along with gender and cultural considerations.
- The revised organizational structure recognizes symptoms that span multiple diagnostic categories, providing new clinical insights in diagnosis.

- Both ICD-9-CM and ICD-10-CM codes are included for each disorder.

The *Diagnostic and Statistical Manual of Mental Disorders*, Fifth Edition, is the most comprehensive, current, and critical resource for clinical practice available to today's mental health professionals.

2013 • 991 pages • ISBN 978-0-89042-554-1 • Hardcover • \$210.00 • Item #2554

2013 • 991 pages • ISBN 978-0-89042-555-8 • Paperback • \$160.00 • Item #2555

2013 • 991 pages • ISBN 978-0-89042-557-2 • eBook • \$128.00 • Item #2557

**DSM-5**  
COLLECTION

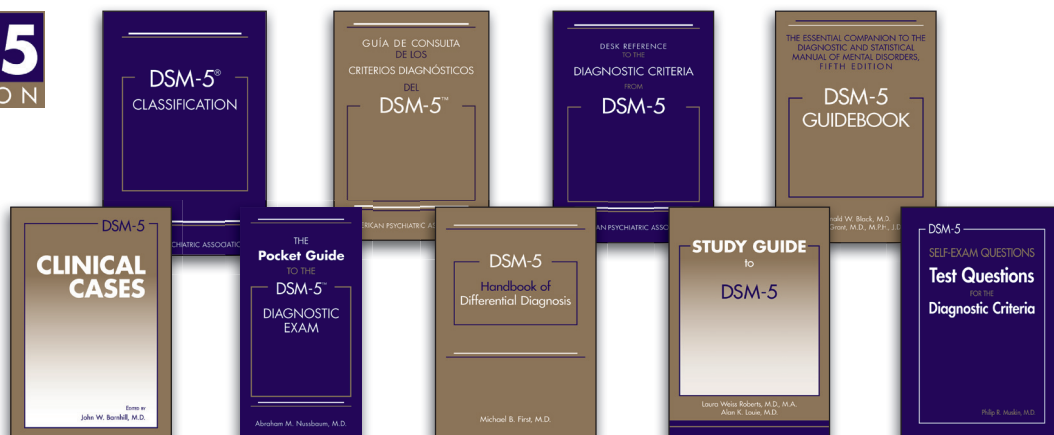

AMERICAN  
PSYCHIATRIC  
ASSOCIATION  
PUBLISHING

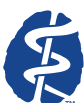

Order Online: [www.appi.org](http://www.appi.org)  
Phone: 703-907-7322  
Toll Free: 1-800-368-5777  
Email: [appi@psych.org](mailto:appi@psych.org)

20% Discount for American Psychiatric  
Association Members

25% Discount for APA Resident-Fellow Members AH1706A
