# psychiatryonline.org

Your Destination for Lifelong Learning in Psychiatry

Your one-stop resource for information on diagnosis, treatment, guidelines, the latest research, and breaking news from the field.

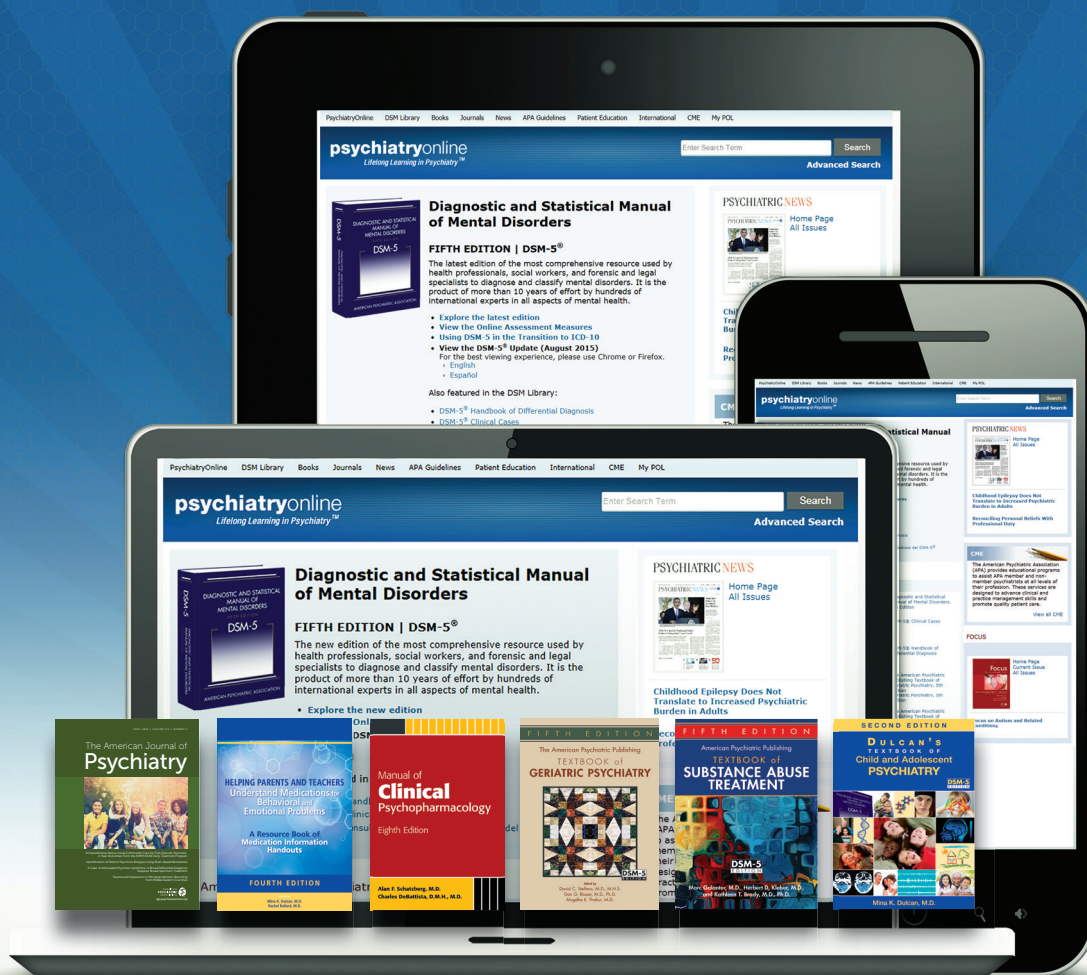

Subscribe to products individually or to the DSM Select package that includes the DSM-5® library, books and select journals.

Go to [www.appi.org](http://www.appi.org) to subscribe.

Institutional subscription options are available.

For more information contact: [institutions@psych.org](mailto:institutions@psych.org); 800-368-5777 ext. 7874

AMERICAN  
PSYCHIATRIC  
ASSOCIATION  
PUBLISHING

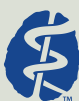

[www.appi.org](http://www.appi.org) • 1-800-368-5777 • [appi@psych.org](mailto:appi@psych.org)

AH1703A
